# Supplementary material for: Combination Analysis of Ferroptosis and Immune Status Predicts Patients Survival in Breast Invasive Ductal Carcinoma
Source: MDPI journal article supplement (doi:10.3390/biom13010147), 2023-01-11
Supplement: s1 [file s1]

**Table S1****Clinical information of train and test sets.**

|                      | <b>Train</b> | <b>Test</b> | <b>X<sup>2</sup></b> | <b>P-value</b> |
|----------------------|--------------|-------------|----------------------|----------------|
| <b>Survival</b>      |              |             | 1.886                | 0.17           |
| Alive                | 286          | 294         |                      |                |
| Dead                 | 46           | 34          |                      |                |
| <b>Age</b>           |              |             | 0.113                | 0.737          |
| <65                  | 237          | 238         |                      |                |
| >=65                 | 95           | 90          |                      |                |
| <b>cancer status</b> |              |             | 0.824                | 0.364          |
| Tumor Free           | 261          | 268         |                      |                |
| With Tumor           | 37           | 30          |                      |                |
| Unknow               | 34           | 30          |                      |                |
| <b>Stage</b>         |              |             | 3.403                | 0.065          |
| StageI               | 52           | 68          |                      |                |
| StageII-IV           | 248          | 222         |                      |                |
| Unknow               | 32           | 38          |                      |                |
| <b>T</b>             |              |             | 0.115                | 0.734          |
| TI-II                | 269          | 261         |                      |                |
| TIII-IV              | 36           | 32          |                      |                |
| Unknow               | 27           | 35          |                      |                |
| <b>N</b>             |              |             | 1.471                | 0.225          |
| N0                   | 134          | 36          |                      |                |
| NI-III               | 165          | 32          |                      |                |
| Unknow               | 33           | 39          |                      |                |
| <b>PR</b>            |              |             | 0.193                | 0.661          |
| Negative             | 116          | 121         |                      |                |
| Positive             | 206          | 200         |                      |                |
| Unknow               | 10           | 7           |                      |                |
| <b>ER</b>            |              |             | 0.115                | 0.735          |
| Negative             | 87           | 84          |                      |                |
| Positive             | 233          | 239         |                      |                |
| Unknow               | 12           | 5           |                      |                |
| <b>HER2</b>          |              |             | 3.524                | 0.061          |
| Negative             | 165          | 175         |                      |                |
| Positive             | 57           | 39          |                      |                |
| Unknow               | 110          | 114         |                      |                |

**Table S2****univariate Cox analysis reveals prognostic-related genes ( $p < 0.05$ )**

| id       | HR   | HR.95L | HR.95H | pvalue |
|----------|------|--------|--------|--------|
| CD74     | 0.75 | 0.59   | 0.94   | 0.01   |
| AIF1     | 0.69 | 0.49   | 0.98   | 0.04   |
| TYROBP   | 0.72 | 0.53   | 0.99   | 0.04   |
| SPI1     | 0.69 | 0.50   | 0.95   | 0.02   |
| SELPLG   | 0.73 | 0.53   | 0.99   | 0.05   |
| HLA-DMA  | 0.71 | 0.52   | 0.97   | 0.03   |
| HLA-DPB1 | 0.77 | 0.60   | 0.99   | 0.04   |
| GNAI2    | 0.34 | 0.18   | 0.62   | 0.00   |
| APOL1    | 0.76 | 0.59   | 0.98   | 0.04   |
| IFI35    | 0.63 | 0.47   | 0.85   | 0.00   |
| LGALS9   | 0.65 | 0.47   | 0.90   | 0.01   |
| PSMB10   | 0.61 | 0.42   | 0.87   | 0.01   |
| PSME1    | 0.56 | 0.37   | 0.83   | 0.00   |
| PSMB8    | 0.71 | 0.55   | 0.91   | 0.01   |
| APOL2    | 0.67 | 0.47   | 0.96   | 0.03   |
| HLA-B    | 0.74 | 0.57   | 0.95   | 0.02   |
| RHOG     | 0.40 | 0.23   | 0.72   | 0.00   |
| HLA-DQB1 | 0.79 | 0.62   | 1.00   | 0.05   |
| LSP1     | 0.73 | 0.54   | 0.99   | 0.04   |
| HCST     | 0.69 | 0.50   | 0.95   | 0.02   |
| PLAAT4   | 0.83 | 0.70   | 0.98   | 0.03   |
| TGFB1    | 0.57 | 0.39   | 0.85   | 0.01   |
| UBE2L6   | 0.66 | 0.49   | 0.90   | 0.01   |



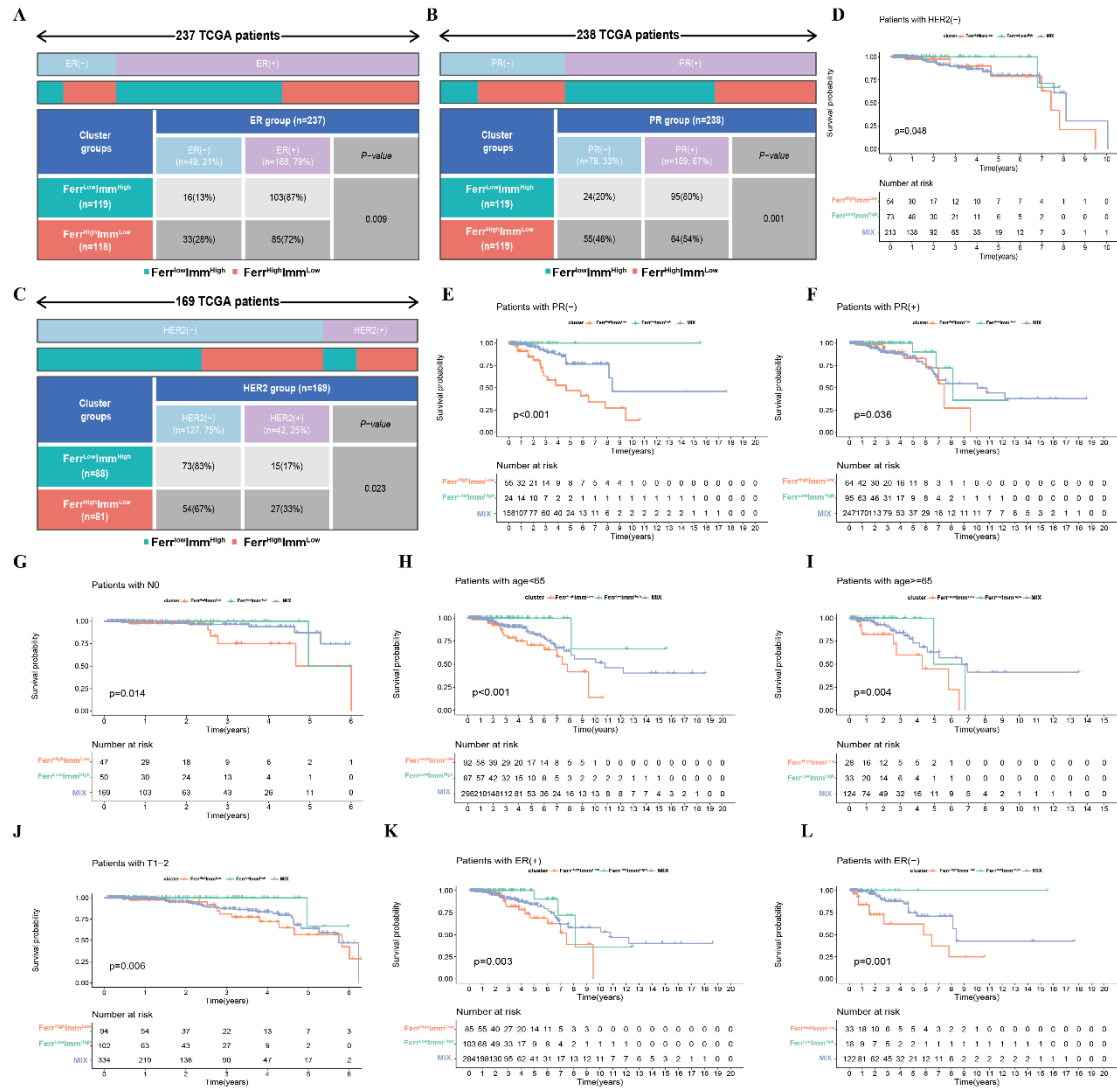

**Figure S2:** Differences in clinical characteristics and clinical stratified survival analysis among the subtypes: (A) The difference in ER expression between Ferr<sup>High</sup>Imm<sup>Low</sup> group and Ferr<sup>Low</sup>Imm<sup>High</sup> group. (B) The difference in PR expression between Ferr<sup>High</sup>Imm<sup>Low</sup> group and Ferr<sup>Low</sup>Imm<sup>High</sup> group. (C) The difference in HER2 expression between Ferr<sup>High</sup>Imm<sup>Low</sup> group and Ferr<sup>Low</sup>Imm<sup>High</sup> group. (D-L) The difference in OS between three groups stratified by clinical characteristics.

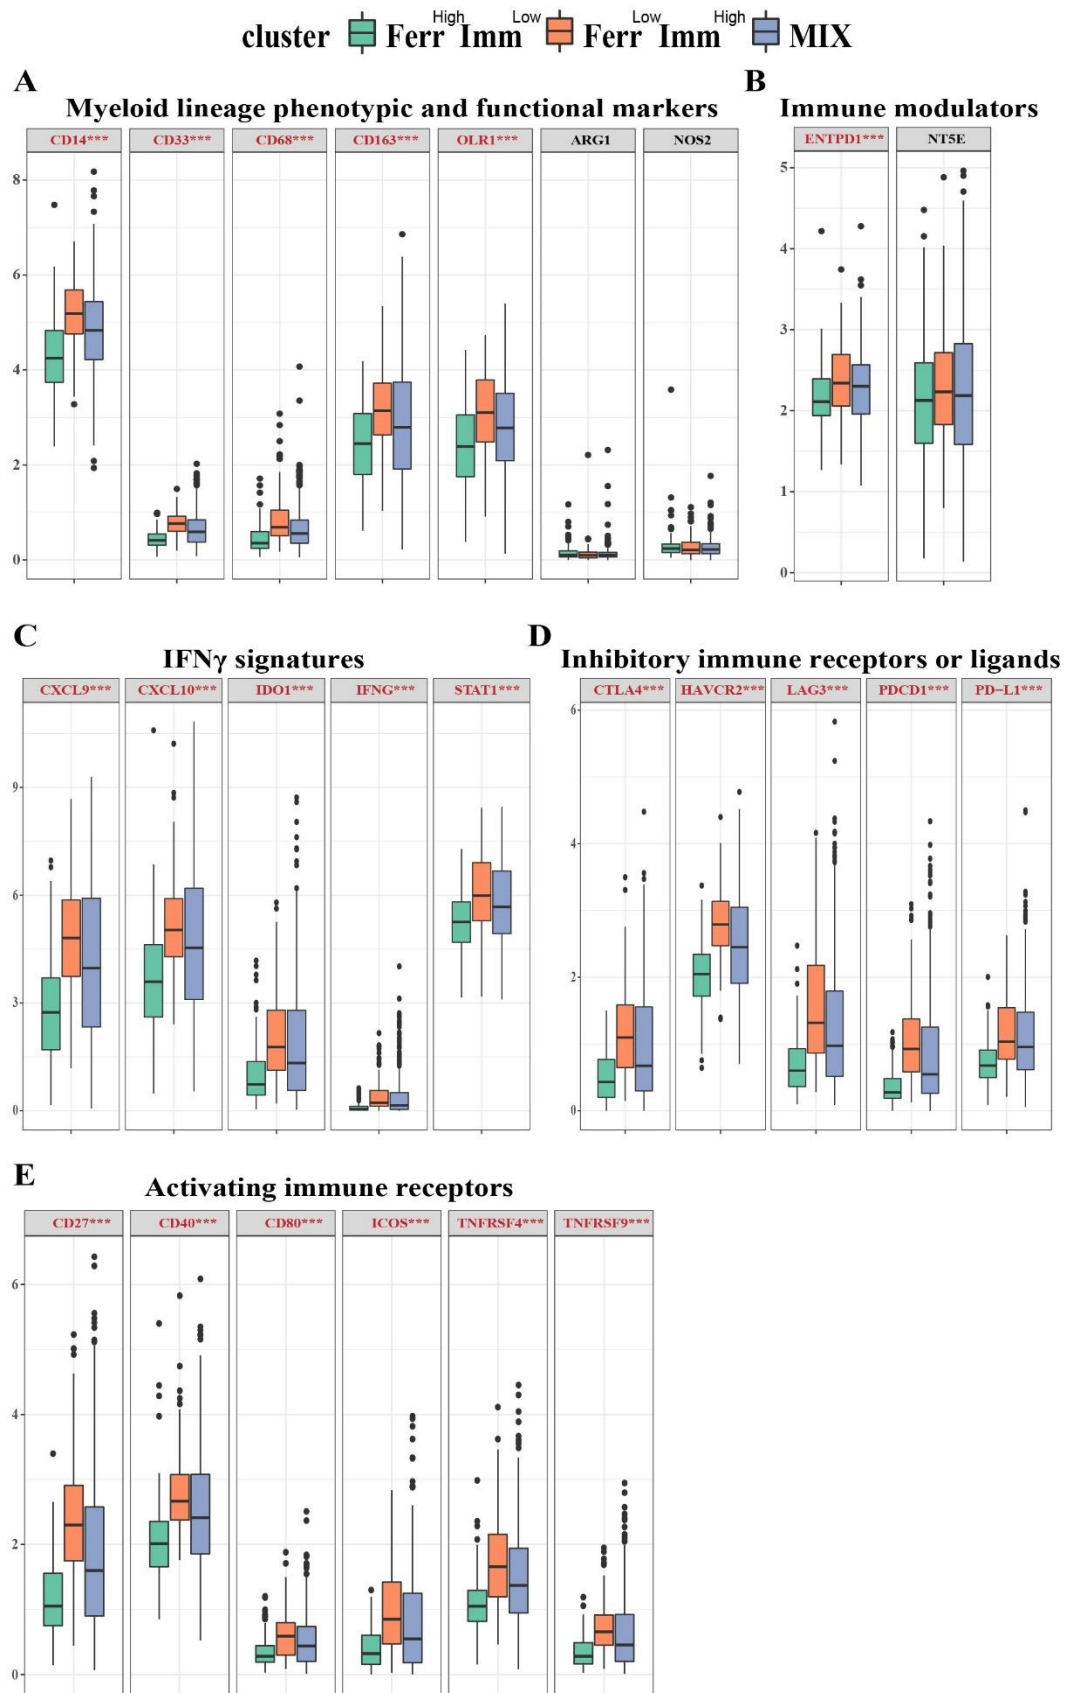

**Figure S3:** Distribution of individual expression of immune-related genes among subtypes. (A) the expression of myeloid lineage phenotypic and functional marker genes between three groups;

(B) the expression of immune modulator genes between three groups; (C) the expression of IFN $\gamma$  marker genes between three groups; (D) the expression of immune activation receptor genes between three groups; (E) the expression of immune suppressive receptor genes between three groups;

A

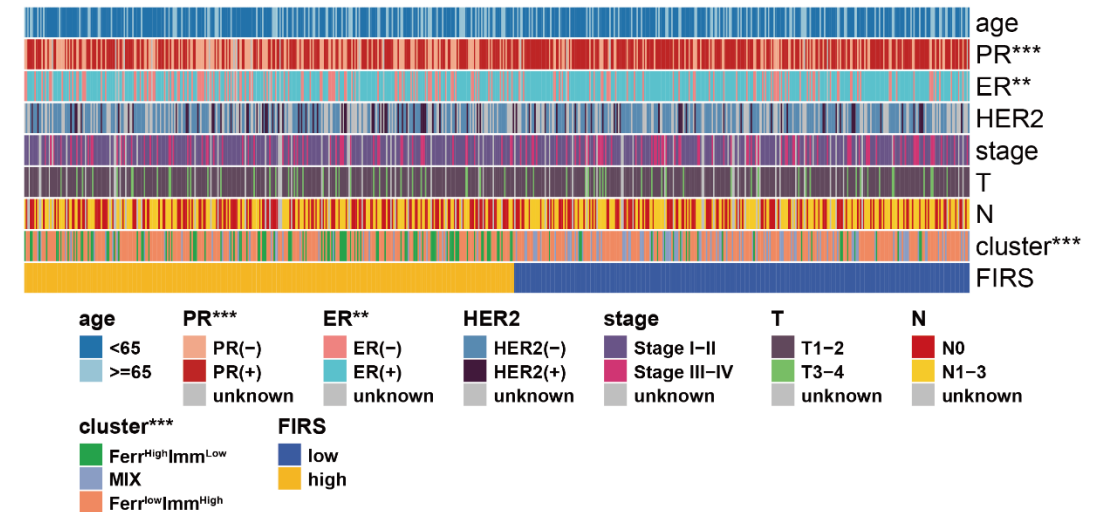

B

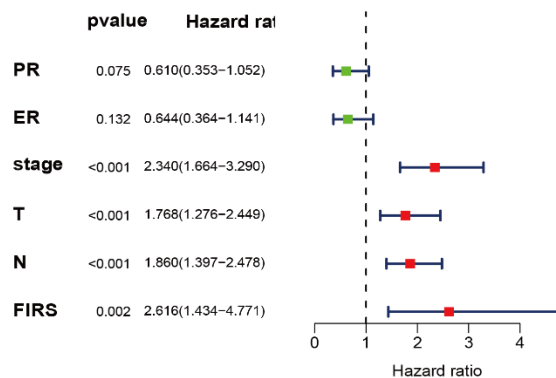

C

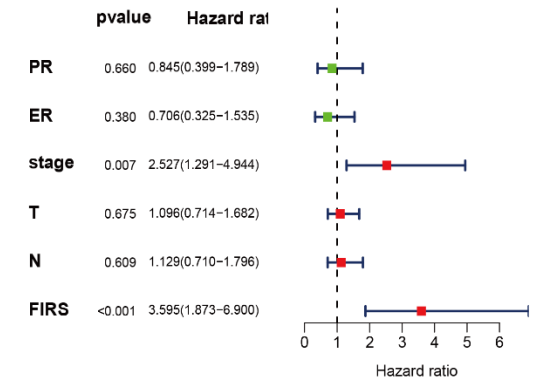

D

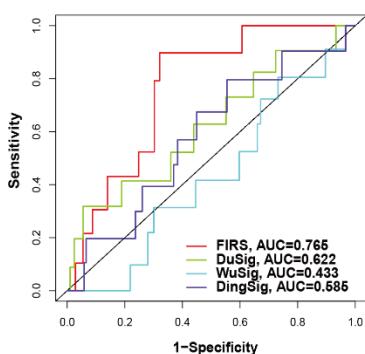

E

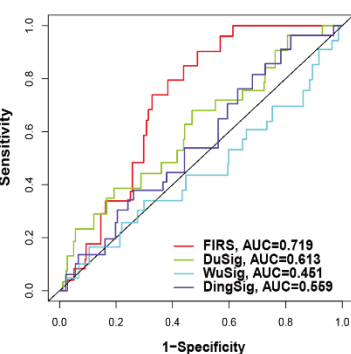

F

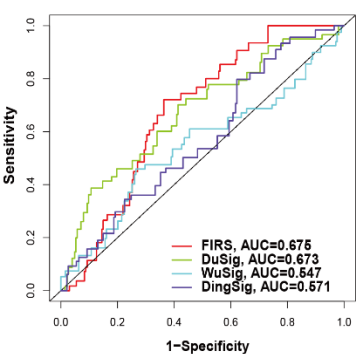

**Figure S4:** Clinical features of FIRS. (A) Heatmap of clinical features between subtypes. (B) Univariate COX analysis of FIRS and other clinical features. (C) Multivariate COX analysis of

FIRS and other clinical features. (D-F) Time-dependent ROC curves at 1, 2, 3 years for patients in our research and previous research.
